1 Dark diversity illuminates the dim side of conservation and restoration

2 Jesper Erenskjold Moeslund<sup>1\*</sup>, Ane Kirstine Brunbjerg<sup>1,2</sup>, Kevin Kuhlmann Clausen<sup>3</sup>, Lars Dalby<sup>1</sup>, Camilla  
3 Fløjgaard<sup>1</sup>, Anders Juel<sup>4</sup>, Jonathan Lenoir<sup>5</sup>

4 1: Section for Biodiversity & Conservation, Department of Bioscience, Aarhus University, Kalø, Denmark

5 2: School of Geography, Earth and Environmental Sciences, University of Birmingham, Birmingham, UK

6 3: Section for Wildlife Ecology, Department of Bioscience, Aarhus University, Kalø, Denmark

7 4: Section for Nature Conservation, The Nature Agency, Ministry of Environment and Food of Denmark,  
8 Copenhagen, Denmark

9 5: UR "Ecologie et dynamique des systèmes anthropisés" (EDYSAN, FRE 3498 CNRS-UPJV), Université de  
10 Picardie Jules Verne, France

11 \* Corresponding author. E-mail: [jesper.moeslund@bios.au.dk](mailto:jesper.moeslund@bios.au.dk), mail-address: Section for Biodiversity &  
12 Conservation, Department of Bioscience, Aarhus University, Grenåvej 14, 8410 Rønne, Kalø, Denmark,  
13 phone: +45 87158986, fax: N/A.

14

## 15 Summary

16 **1** *Dark diversity* is a promising concept for prioritizing management efforts as it focuses on missing species,  
17 i.e., species present in the regional pool, but locally absent despite suitable environmental conditions. **2** We  
18 applied the concept to a massive national plant diversity database (236,923 records from 15,160 surveys  
19 involving 564 species) to provide the first geographically comprehensive assessment of dark diversity across  
20 a large area (43,000 km<sup>2</sup>), at a spatial scale (~75 m<sup>2</sup>) relevant for conservation and restoration planning and  
21 across multiple terrestrial habitats, thus maximising its practical application potential. The likelihood for a  
22 given plant species to belong to the dark diversity pool was computed and logistically regressed against its  
23 ecological preferences (nutrient availability, pH etc.), strategies (competitor, stress tolerance, ruderal),  
24 mycorrhizal dependence and infection percentage, seed mass and maximum dispersal distance. **3** Forty-six  
25 percent of the species were absent in >95 % of the suitable sites, whereas 7 % of the species were absent in  
26 less than 60 % of sites that were deemed suitable. **4** Species that were more likely to belong to the dark  
27 diversity tended to depend on mycorrhiza, were mostly adapted to low light and nutrient levels, had poor  
28 dispersal abilities, were ruderals and had a low stress tolerance. **Synthesis and applications** Our findings  
29 have important implications for the planning and management of natural ecosystems requiring detailed  
30 knowledge of what triggers the presence/absence of individual plant species in a seemingly suitable  
31 habitat. We conclude that practitioners may need to carefully consider mycorrhizal inoculations with a  
32 suitable assemblage of fungi for certain plant species to become established. Also assisted migration might  
33 be necessary to help poor dispersers although spatial and temporal processes are also important to have in  
34 mind. Finally, it is important to vary nutrient loads making room for plant species to colonise both nutrient-  
35 poor and nutrient-rich localities.

36 **Keywords:** Assisted migration; dispersal distance; Ellenberg indicator values; Grime strategies; mycorrhiza;  
37 phylogenetic autocorrelation; plant traits; regional species pool; vegetation ecology

## 38 Introduction

39 Recently, Pärtel and co-workers (2011) presented a new concept coined *dark diversity*, which could prove  
40 to be a central idea for the development of effective tools for practical biodiversity management and  
41 conservation prioritization at relevant spatial scales. Dark diversity encompasses the diversity articulated by  
42 all species missing locally, even though biogeographic history and current ecological and environmental  
43 conditions suggest their presence (Pärtel, Szava-Kovats & Zobel, 2011). In other words, dark diversity is the  
44 set of species belonging to the regional species pool of a particular habitat but that are missing locally  
45 within a given site of that habitat (Pärtel, Szava-Kovats & Zobel, 2011). Note that the dark diversity concept  
46 differs from the so-called *hidden diversity* which counts species that are overlooked due to observation bias  
47 (Milberg *et al.*, 2008).

48 Possible causes for species belonging to the dark diversity are manifold and include, but are not  
49 limited to, lower-level ecological filters involving metapopulation and metacommunity dynamics (cf.  
50 dispersal limitations and habitat fragmentation, Tilman, 1997; Fahrig, 2003) or complex biotic interactions  
51 (e.g. competition, parasitism, mutualism and symbiotic phenomena like mycorrhiza, Grime, 1979; Torrez *et*  
52 *al.*, 2016). To our knowledge, the likelihood of individual species to belong to the dark diversity has never  
53 been studied and little is known about the characteristics of species having a higher chance to belong to the  
54 dark diversity pool than others (but see Riibak *et al.*, 2015).

55 Recently, the dark diversity concept has been proposed as a new facet of biodiversity for gaining  
56 useful knowledge for restoration and conservation issues (Pärtel, Szava-Kovats & Zobel, 2011). However, till  
57 now only few studies have been inspired by this (Gijbels, Adriaens & Honnay, 2012; Yoshioka *et al.*, 2014;  
58 Riibak *et al.*, 2015; Ronk, Szava-Kovats & Pärtel, 2015). Indeed, these have been successful albeit suffered  
59 from various weaknesses preventing a more general application: (1) spatial extent or resolution was not  
60 directly relevant for practical nature conservation and restoration planning (Riibak *et al.*, 2015; Ronk, Szava-  
61 Kovats & Pärtel, 2015), (2) scope was only a single habitat or ecosystem (Yoshioka *et al.*, 2014; Riibak *et al.*,

62 2015) or (3) only a few species were involved (Gijbels, Adriaens & Honnay, 2012). Although the restoration  
63 potential of a given site may depend on a number of site-specific factors, like fragmentation and biotic  
64 interactions within the focal community, searching across multiple sites and habitats for common traits  
65 among typical dark diversity species may clarify potential drivers of the observed site-specific species  
66 distribution patterns. Hence, studying the features of species that belong to the dark diversity more often  
67 than others could prove to be an important key for successful practical application of dark diversity in  
68 restoration and conservation.

69         Clearly, the delimitation of the regional species pool can impact the assessment of dark diversity  
70 massively. Consequently, this issue has been one of the major concerns of the original dark diversity  
71 approach: if habitats are delimited rather categorically as suggested in the original concept paper (Pärtel,  
72 Szava-Kovats & Zobel, 2011) the actual natural environmental gradients are ignored (Mokany & Paini,  
73 2011). For plants, regional species pools have been successfully identified using the species indicator values  
74 presented by Ellenberg *et al.* (2001) for Central European plant species (Pärtel *et al.*, 1996). Ellenberg's  
75 indicator values (EIVs) represent European plant species' preferred position along various environmental  
76 gradients and are often used in vegetation studies (Ellenberg *et al.*, 2001; Diekmann, 2003; Lenoir *et al.*,  
77 2010; Moeslund *et al.*, 2013). Recently, Ewald (2002) proposed a probabilistic procedure (Beals' index) to  
78 estimate regional species pools based on co-occurrence patterns among species. This approach is currently  
79 known to yield the most realistic estimates of the regional species pool (Lewis, Szava-Kovats & Pärtel,  
80 2016).

81         Restoration, conservation and nature management typically take place at relatively fine spatial  
82 resolutions. Obviously, considering dark diversity at a resolution relevant for conservation and restoration  
83 management is likely to inflate the dark diversity simply because smaller areas support fewer species all  
84 else being equal (McArthur & Wilson, 1967). For this reason, comparing dark diversity from areas of  
85 different sizes where co-occurrence data were collected in a different manner is not meaningful without

86 accounting for these effects. To ensure a reliable assessment of dark diversity, co-occurrence data collected  
87 at fine spatial resolution across large spatial extent and in a systematic manner – like in national  
88 biodiversity inventories (e.g. Fredshavn, Nygaard & Ejrnæs, 2009) – is needed.

89 Here we present the first national assessment of the characteristics of typical dark diversity plants at  
90 a spatial resolution relevant to conservation and restoration management, covering multiple open  
91 terrestrial habitats. Using a large national plant dataset with high spatial accuracy and a combination of  
92 EIVs, Grime’s plant strategies, mycorrhizal information and dispersal distance calculations, we address the  
93 following specific study questions: (1) does North-European plant species differ in how often they occur in  
94 the dark diversity pool (species’ likelihood to belong to dark diversity)? (2) If so, which plant traits or  
95 ecological characteristics explain this pattern the best? Finally, we discuss the causal mechanisms most  
96 likely involved and how our findings may aid effective planning and management initiatives and promote  
97 the practical application of the dark diversity concept within conservation and restoration.

## 98 Methods

### 99 **Vegetation data**

100 Data on the distribution of vascular plants in Denmark was obtained from municipalities’ vegetation  
101 inventory of natural habitat types (Fredshavn, Nygaard & Ejrnæs, 2009). We used observations from 5-m  
102 radius circular plots laid out to capture the typical flora of a particular site in question (typically one plot per  
103 site). The sites are 5 ha on average (ranging between 0.003 – 900 ha), distributed throughout most of  
104 Denmark (Fig. 1) and cover freshwater meadows, salt meadows, heathlands, bogs, moors, fens, grasslands  
105 and vegetated dunes (i.e. open habitats). The dataset was extracted 6 October 2014. We used data from  
106 2004 – 2014 encompassing 236,923 records from 15,160 plots involving 564 plant species after application  
107 of the filters described in the following. We only considered observations at the species level and excluded  
108 all neophytes (Appendix tables 6–8 in Buchwald *et al.*, 2013), i.e. species that are not considered a natural

109 part of the vegetation given their history and dispersal ability), shrubs, trees and submersed aquatic  
110 species. To ensure meaningful calculations of the regional species pool (see below) only plots with more  
111 than five plant species records were used.

### 112 **Regional species pool and dark diversity**

113 To yield the best estimates of dark diversity, we used Beals' index (Beals, 1984) to assess the regional  
114 species pool for each plot as recommended by Lewis, Szava-Kovats & Pärtel (2016). For each plot, Beals'  
115 index represents the probability that a focal species will occur within that plot given the assemblage of  
116 species co-occurring there (McCune, 1994). See details in Münzbergova & Herben (2004). Initially, a  
117 presence/absence matrix with all combinations of plot and species was calculated. Based on this matrix, we  
118 calculated Beals' index for each species in each plot excluding the focal species from the calculations (as  
119 recommended by Oksanen *et al.*, 2015) (Fig. 2). We used the "beals()" function in the "vegan" package  
120 (Oksanen *et al.*, 2015). The threshold for including a species in the regional species pool was defined as the  
121 5<sup>th</sup> percentile of the Beals' index value for the species following Gijbels, Adriaens & Honnay (2012) as well  
122 as Ronk, Szava-Kovats & Pärtel (2015). Additionally, we only considered data for plots having Beals' index  
123 values above that of the lowest value where the species was indeed present. For every plot the dark  
124 diversity was composed by all species in the regional pool excluding those that were actually present  
125 (Pärtel, Szava-Kovats & Zobel, 2011) (Fig. 2).

### 126 **Response variable**

127 As a response variable, we computed the species' likelihood to belong to dark diversity (cf. the ratio of the  
128 number of occurrences in the dark diversity pool divided by the number of occurrences in the regional  
129 species pool) (Figs 2 & 3) for each of the 564 plant species used in our analyses.

### 130 **Species traits and characteristics (explanatory variables)**

131 Ellenberg's indicator values

132 We used Ellenberg's indicator values (EIVs) (Ellenberg *et al.*, 2001) adjusted to British conditions (Hill *et al.*,  
133 1999) as these adjusted values are thought to best match the Danish flora (Moeslund *et al.*, 2013).  
134 Variation in temperature (EIV<sub>T</sub>) and continentality (EIV<sub>K</sub>) in Denmark is negligible and salinity (EIV<sub>S</sub>) is only  
135 relevant in coastal environments. Consequently, we only considered EIVs for: (1) soil moisture (EIV<sub>F</sub>), (2) soil  
136 pH (EIV<sub>R</sub>), (3) soil nutrient status (EIV<sub>N</sub>) and (4) ambient light (EIV<sub>L</sub>) (Table S1). EIVs for soil nutrient status  
137 and pH are typically highly correlated (Diekmann & Falkengren-Grerup, 1998; Seidling, 2005); hence we  
138 calculated a nutrient/pH-ratio (EIV<sub>N/R</sub>) as an alternative variable based on the two corresponding EIVs. This  
139 variable represents the species' preference for nutrient availability (see for example Andersen *et al.*, 2013).

#### 140 Grime plant strategies

141 The main plant strategies presented by Grime (1979) enables scientists to distinguish between plants  
142 adapted to competitive (C-species), stressful (S-species) or ruderal (R-species) environments. Although  
143 plants can harbour any combination of these three strategies they are in their extreme forms mutually  
144 exclusive (Grime, 1979). For this study, we obtained the strategies for each plant species from the BioFlor  
145 database (Kühn, Durka & Klotz, 2004). Grime plant strategy data was available for all species included here  
146 (Table S1). Following Ejrnæs & Bruun (2000), we represented the degree to which a plant is adapted to a  
147 given strategy as values ranging from 1–12 for each of the three strategies, however restraining their sum  
148 to 12.

#### 149 Mycorrhiza data

150 We used data on both mycorrhizal infection percentage (0 to 100%) and dependence (i.e., a factor variable  
151 with two levels: obligately vs. not obligately mycorrhizal). Data on mycorrhizal infection was retrieved from  
152 Akhmetzhanova (2012) and data on mycorrhizal dependence was taken from MycoFlor (Hempel *et al.*,  
153 2013). These data were available for 33 % and 82 %, respectively, of the plant species involved in this study  
154 (Table S1).

155

## 156 Plant functional traits

157 The trait data has two purposes: (1) it is used for modelling dispersal distance (see below) and (2) seed  
158 mass is used as an explanatory variable representing an alternative measure of dispersal distance as well as  
159 the plants ability to establish at new sites. We obtained seed mass (SM), dispersal syndrome (DS), releasing  
160 height (RH), terminal velocity (TV) and growth form (GF) data from the LEDA and BioFlor databases (Kühn,  
161 Durka & Klotz, 2004; Kleyer *et al.*, 2008). Where multiple records of SM, RH and TH were available for the  
162 same species, the mean value was used. Missing data on DS and GF was taken from Hansen (1996) making  
163 these two traits available for all species (94 % and 77 % of the species respectively were covered by the  
164 aforementioned databases). Data on SM, RH and TV was available for 89 %, 91 % and 68 % of our study  
165 species, respectively.

166 Subsequently, we calculated maximum dispersal distance (MDD) using the “dispeRsal()” function (Tamme  
167 *et al.*, 2014). This function calculates MDD using plant traits and taxonomy. For 70% of the species, MDD  
168 was calculated with a model including DS, GF and TV. For the remaining 30% of the species MDD was  
169 calculated using simpler models following the hierarchy of best predictive performance given in Tamme *et*  
170 *al.* (2014). For species with multiple different entries of a trait (e.g. DS) we calculated the mean of the  
171 predicted MDDs. Table S1 lists the MDDs calculated for each species.

## 172 **Data analysis**

173 We used binomial generalised linear models (GLMs) for proportion data to explore the relationship  
174 between the plants’ likelihood of being part of the dark diversity (binomial response variable; no. of times  
175 in dark diversity/no. of times in the regional species pool) and the 13 explanatory variables listed in Table 1.  
176 All variables were tested for multicollinearity (see Figure S1). The EIVs for nutrients and pH both showed a  
177 high degree of multicollinearity (tolerances below 0.15, Quinn & Keough, 2002) and therefore we decided  
178 to use the nutrient/pH-ratio (described above) instead to represent the plants’ nutrient preferences (Table  
179 1).



180 Not all traits and characteristics were available for every species in the dataset (see method sections  
181 above). In order to maximize the sample size we initially ran model selection (see section below) on models  
182 including only the explanatory variables which were available for the majority of the species ( $n = 564$ , Table  
183 S2). These models are referred to as *high sample size models* in the following. Being available for a lower  
184 number of species ( $n = 457$ ) dispersal distance was subsequently added to the models subject to model  
185 selection (*medium sample size models*). Finally, we ran model selection on models with all explanatory  
186 variables listed in Table 1 ( $n = 151$ , *low sample size models*). Since the three Grime-based variables were  
187 highly dependent on each other, only one Grime variable was included in a model at a time. Also, since the  
188 calculations of maximum dispersal distance involved seed mass these two variables never occurred  
189 simultaneously in any of the models to avoid redundancy. Following the above-mentioned constraints, we  
190 built three sets of candidate models and used Akaike's Information Criteria (AIC, Akaike, 1974) to select the  
191 best model within each sample size group following best practice as recommended in Burnham & Anderson  
192 (2002) (for details on model selection and setup, see Table S2).

193 A typical issue in the investigation of plant species traits and characteristics is phylogenetic  
194 autocorrelation, i.e. the fact that closely related species also tend to be more similar in traits and  
195 characteristics (Gittleman & Kot, 1990). Accordingly, we checked all models' residuals for phylogenetic  
196 autocorrelation as described below. We used the Daphne phylogenetic tree for the European flora (Durka  
197 & Michalski, 2012) and followed the vignette by Paradis (2015) to calculate Moran's I of each model's  
198 residuals using the reciprocal phylogenetic distances between species. This computation was performed  
199 using the "Moran.I()" function in the "ape" package (Paradis, Claude & Strimmer, 2004). Six models showed  
200 significant phylogenetic autocorrelation. To account for this we constructed phylogenetic eigenvector  
201 filters following best practise (Borcard & Legendre, 2002; Diniz-Filho & Bini, 2005). Filters that explained  
202 significant variation in the best models' residuals were added successively to these best models in addition  
203 to the explanatory variables. After each addition of a filter, the model residuals were checked for  
204 autocorrelation. When Moran's I showed no significant autocorrelation the process stopped. Significance

205 and effect sizes of explanatory variables in the models were reassessed but no further model selection was  
206 performed.

207 All analyses were conducted using R (R Core Team, 2015).

## 208 Results

209 On average, species were part of the dark diversity in 88.6 % of the plots for which the species was indeed  
210 in the regional pool (Table S1).

211 We found phylogenetic autocorrelation in the residuals of six models (Moran's I test,  $P < 0.05$ ). The  
212 addition of 1 to 8 phylogenetic filters successfully removed autocorrelation and caused no notable shifts in  
213 effects sizes or significance (Table 2, Table S3).

214 The goodness of fit for our models was up to 0.14 ( $D^2_{adj}$ ), with the more complex low sample size  
215 models – including potential maximum dispersal rate, average seed mass and mycorrhizal information –  
216 having the best fits (Table 2). Our models suggest that the factors best explaining the plants' likelihood of  
217 being in the dark diversity are (mentioned in the order of importance): mycorrhizal dependence,  
218 preference for light and nutrients, ruderality, maximum dispersal distance, seed mass, mycorrhizal infection  
219 percentage, stress-tolerance, competitive ability and preference for soil moisture (Table 2). We found  
220 strong indications that obligate mycorrhizal plants are more often part of the dark diversity than plants not  
221 depending on mycorrhiza (Fig. 4). This finding was supported by the fact that species with higher dark  
222 diversity likelihood had a higher degree of infection by mycorrhiza (Table 2, Fig. 4). In addition, plants more  
223 frequently in the dark diversity were adapted to thrive under low nutrient availability and low-light (Fig. 4),  
224 had poor dispersal abilities and heavier seeds. In terms of Grime strategies, the high dark-diversity-  
225 likelihood species were more ruderal, less competitive and less stress-tolerant (Table 2).

## 226 Discussion

## 227 **Differences in species' dark diversity likelihood**

228 Intuitively, typical dark diversity species are rarer than their habitat would suggest, for example rare species  
229 with a fairly common habitat (Fig. 3). A species such as *Tephroses palustris* (L.) Rchb. was often found in  
230 the dark diversity (Fig. 3a). This species is rare in Denmark although it has a wide distribution in Northern  
231 Europe including Scandinavia, the Baltic region and all the way to arctic Russia (Kochjarová, 2006). It is  
232 extinct in Great Britain, the Czech Republic, Hungary, Slovakia and Romania (Kochjarová, 2006) and  
233 critically endangered in Sweden (Olsson & Tyler, 2001). However, it tends to colonize bare mud along pond  
234 margins and is even known from recycling depots (Frederiksen, Rasmussen & Seberg, 2006) – habitats that  
235 are far from rare in Denmark. Hence, habitat availability alone cannot explain its rarity. This was also the  
236 case for *Leontodon hispidus* L., *Campanula persicifolia* L., *Vicia tetrasperma* (L.) Schreb. and several others  
237 (Table S1). On the other hand, species that occurred less often in the dark diversity were in many cases  
238 species that are common within their habitats, such as *Calluna vulgaris* (L.) Hull (common in heathlands,  
239 Fig. 3) and *Tripolium vulgare* Nees (common in salt meadows) or alternatively they were common  
240 generalists like *Achillea millefolium* L., *Festuca rubra* L., *Urtica dioica* L. etc. (Frederiksen, Rasmussen &  
241 Seberg, 2006).

## 242 **The relative importance of explanatory factors and their likely causal mechanisms**

243 Apart from stochasticity (Hubbell, 2001), there are generally three factors important for species' dark  
244 diversity likelihood: (1) dispersal ability, (2) establishment success and (3) persistence in a given habitat.  
245 The explanatory factors tested in this study all fall within these three categories. Factors primarily involved  
246 in establishment and persistence were the most important ones in our study overall: mycorrhizal  
247 dependence and the plants' preference for available nutrients and light. Dispersal related factors such as  
248 the plants' maximum dispersal distance and the seed mass were also important, with the latter playing a  
249 role for both dispersal and establishment (see below).

## 250 Establishment and persistence

251 A key ability in plants' life cycle is their establishment once the seed has settled at a given site (Muller-  
252 Landau *et al.*, 2002). Many factors such as seed herbivory, seed resistance to pathogens, stress-events like  
253 drought or flooding and the seeds' endosperm resources can affect this ability (Maun, 1994; Muller-Landau  
254 *et al.*, 2002; Moles & Westoby, 2004). Another imperative aptitude for establishment of some plants is the  
255 development of mycorrhizae (Akhmetzhanova *et al.*, 2012; Gijbels, Adriaens & Honnay, 2012; Hempel *et*  
256 *al.*, 2013). Additionally, mycorrhizae have been shown to be important not only in the establishment phase  
257 but also for the persistence of plant species and consequently for the local plant community composition  
258 (Hartnett & Wilson, 1999). Here we demonstrated that plants depending on mycorrhiza and plants that  
259 require a high degree of mycorrhizal infection had higher dark diversity likelihood. This result is not  
260 surprising given the importance of mycorrhiza for plant establishment and persistence.

261 Competition for resources is an important phenomenon shaping the local structure, composition and  
262 richness of plant communities throughout the world (Tilman, 1994; Tilman, 1997; McKane *et al.*, 2002;  
263 Moeslund *et al.*, 2013). In the current study, we showed that plants with high dark diversity likelihood  
264 preferred low levels of nutrients. In most of Northern Europe and particularly in Denmark the landscape is  
265 relatively nutrient rich. In such a setting, plant species like *Urtica dioica* L., *Epilobium hirsutum* L. and  
266 *Cirsium arvense* (L.) Scop. adapted to benefit from high nutrient availability will be strong competitors  
267 (Grime, 1979; Hill *et al.*, 1999; Ellenberg *et al.*, 2001) and therefore have lower dark diversity likelihood.  
268 Plants with competitive advantages (e.g., regarding resources) will tend to appear more often in suitable  
269 habitats than species being less strong competitors in these habitats.

270 In our study demonstrated that shade tolerant plants were more likely to be part of the dark  
271 diversity. The possible explanation for this finding is probably multifaceted. Plants that are more or less  
272 shade tolerant may have competitive disadvantages in open landscapes (recall that this study concerns only  
273 open habitats). Also, the fact that the landscape was prehistorically (around 5000 BC) almost completely  
274 forested (Fritzboøger & Odgaard, 2010) can explain this observation. Indeed, shade tolerant species likely to

275 occur dormant in the soil seed bank may have been present and more frequent across Denmark during  
276 the past, when forests were more dominant, and may return (cf. memory effect due to land-use legacy) if  
277 land-use returns to forest habitats. A third explanation could be that since forests are not included in this  
278 study some shade tolerant species may have higher dark diversity likelihood simply because they prefer  
279 forest environments. While there are indeed examples of such “forest-species” that occasionally occur in  
280 open habitats in our dataset (e.g. *Galium odoratum* (L.) Scop. and *Allium ursinum* L.), there are also several  
281 examples of shade tolerant species often belonging to the dark diversity albeit in reality observed almost as  
282 often in open landscapes as in forests: e.g. *Maianthemum bifolium* (L.) F.W.Schmidt and *Trientalis europaea*  
283 L. (EIV<sub>L</sub> = 3 and 5 respectively, both widespread in grasslands, meadows, heathlands, forests etc.) (Mossberg  
284 & Stenberg, 2005).

285         In many environments, stress tolerance is a key factor shaping local plant diversity (Osmond *et al.*,  
286 1987; Maun, 1994; Ejrnæs & Bruun, 2000; Moeslund *et al.*, 2011). Recently, researchers showed that  
287 stress-tolerance was among the most important determinants of plant dark diversity in North-Eastern  
288 European dry calcareous grasslands (Riibak *et al.*, 2015). They suggested that in the driest grasslands stress-  
289 tolerant species are more likely to thrive and therefore less likely to be part of the dark diversity. For our  
290 study this explanation could also be true. Many of the habitats we included are stressful environments  
291 either because they are relatively dry (grasslands, heathlands), waterlogged (fens, bogs, meadows) or saline  
292 (salt meadows). However, another equally plausible explanation could be that ruderal species occurred  
293 more often in the dark diversity than non-ruderals and the plants’ ruderality was significantly negatively  
294 related to the plants’ stress-tolerance. From the fact that highly ruderal species cannot be highly stress-  
295 tolerant at the same time (Grime, 1979) it follows that the likelihood of ending up in the dark diversity  
296 could actually be related to ruderality, not stress-tolerance.

297 Dispersal

298 We showed that species with higher dark diversity likelihood were also generally poorer dispersers. This  
299 result was supported by Riibak (2015) for dry calcareous grasslands. It is intuitively meaningful and a well-  
300 known fact that species with poor dispersal abilities also have a lower probability of dispersal to new  
301 suitable sites and to recolonize sites where these species have earlier gone extinct (Tilman, 1997; Cain,  
302 Milligan & Strand, 2000; Myers & Harms, 2009; Torrez *et al.*, 2016). This explanation is corroborated by the  
303 result that species with a higher seed mass was also more often part of the dark diversity. Heavy seeds are  
304 more unlikely to spread long distances and thereby reach suitable habitats (Marteinsdóttir & Eriksson,  
305 2013). Also, heavy-seed species typically produce less seeds lowering the probability that one of them will  
306 eventually arrive at a suitable site (Cornelissen *et al.*, 2003; Riibak *et al.*, 2015).

### 307 **Explaining dark diversity likelihood**

308 As expected – given their importance for plant species establishment, dispersal or persistence – the factors  
309 included here were able to significantly explain plant species’ dark diversity likelihood. The goodness of fit  
310 ( $D^2_{adj}$ ) we obtained implies that even though most of the explanatory factors were important for plants’  
311 dark diversity likelihood other factors not tested here may also be involved. Site conditions such as habitat  
312 fragmentation and reduced habitat patch sizes may be important issues that can explain why many species  
313 are missing in suitable places (Fahrig, 2003). However, the plants’ ability to survive in a fragmented small-  
314 habitat-patch landscape is not trivial to measure and attempts to directly relate plant traits to this ability  
315 are therefore rare (Dupré & Ehrlén, 2002; May *et al.*, 2013). We attempted to account for this by including  
316 dispersal distance and seed mass, as suggested by May *et al.* (2013) and Grime’s plant strategies, which  
317 relate to seed number, life span, seed bank strategy and pollination strategy (Grime, 1979; Rees, 1994; Šerá  
318 & Šerý, 2004; Pierce *et al.*, 2014), which again relate to species’ probability to go extinct in a suitable  
319 habitat patch (Eriksson, 1996; Dupré & Ehrlén, 2002; Gijbels, Adriaens & Honnay, 2012). On the other hand,  
320 researchers have recently found that while seed production traits are integral to Grime’s plant strategies  
321 this relationship is not straight-forward (Pierce *et al.*, 2014). This might also be true for relationships

322 between Grime's plant strategies and factors such as life span and pollination strategy and therefore future  
323 studies may obtain a higher goodness of fit by analysing the individual traits instead of proxies for these.  
324 Furthermore, phenotypic plasticity and general susceptibility to pathogens are likely to play a role for the  
325 persistence of plants (Augspurger & Kelly, 1984; Burdon, Thrall & Ericson, 2006; Reed *et al.*, 2010).

### 326 **Management implications**

327 In the EU, part of the biodiversity strategy is to halt biodiversity loss by 2020. This goal requires both  
328 researchers and managers to make the most of the limited funds available. Restoring or conserving  
329 ecosystems or habitats is often focused on re-establishing or improving environmental conditions and then  
330 hoping that biodiversity will respond positively. Tools that improve our understanding of the causal  
331 mechanisms behind which species remain absent and why despite seemingly suitable conditions is  
332 extremely useful and could be highly beneficial for restoration and conservation efforts.

333         For conservation and restoration our findings underpin the importance of assessing the funga's  
334 ability to sustain the flora of concern at a given site. Inoculation with certain fungi could aid to restore plant  
335 communities (Torrez *et al.*, 2016). However, great care needs to be taken during this proces with the best  
336 results probably obtained by adding a diverse and locally adapted mycorrhizal community (Klironomos,  
337 2003).

338         The fact that dispersal limitation is an important factor for species' dark diversity likelihood strongly  
339 suggests that space and time are imperative factors in the planning and management of nature. Given  
340 enough time and suitable corridors for dispersal, even poor dispersers will eventually reach suitable but  
341 distant habitats. This finding also highlights the need to accommodate this by considering assisted  
342 migration (Seddon, 2010).

343 Also, our study suggest focusing on creating opportunities for ruderal species in restoration and  
344 conservation projects; e.g. by making sure that bare soil for seed germination is made available through  
345 disturbances such as erosion, fire, trampling by large herbivores etc.

346 Finally, our results strongly emphasize the importance of focusing on nutrients and light availability in  
347 conservation and restoration. Failing to ensure nutrient poor sites in regions with heavy nutrient loads will  
348 render a number of species unable to thrive in otherwise suitable areas. Creating more shade in open  
349 habitats could potentially aid low-light-adapted species in reappearing from the dark diversity pool.

## 350 Acknowledgements

351 We are grateful to 15. Juni Fonden for economic support.

## 352 Data accessibility

353 - Species geography: [www.naturdata.dk](http://www.naturdata.dk)

354 - Species traits: LEDA, BioFlor and MycoFlor databases, Akhmetzhanova *et al.* (2012), TableS1

## 355 References

356 Akhmetzhanova, Soudzilovskaia, Onipchenko, Cornwell, Agafonov, Selivanov & Cornelissen. (2012) A  
357 rediscovered treasure: mycorrhizal intensity database for 3000 vascular plant species across the former  
358 Soviet Union. *Ecology*, **93**, 689–690.

359 Andersen, D.K., Nygaard, B., Fredshavn, J.R. & Ejrnæs, R. (2013) Cost-effective assessment of conservation  
360 status of fens. *Applied Vegetation Science*, **16**, 491–501.

361 Augspurger, C.K. & Kelly, C.K. (1984) Pathogen mortality of tropical tree seedlings: experimental studies of  
362 the effects of dispersal distance, seedling density, and light conditions. *Oecologia*, **61**, 211–217.

363 Beals, E.W. (1984) Bray-Curtis ordination: an effective strategy for analysis of multivariate ecological data.  
364 *Advances in Ecological Research*, **14**, 1–55.

365 Borcard, D. & Legendre, P. (2002) All-scale spatial analysis of ecological data by means of principal  
366 coordinates of neighbour matrices. *Ecological Modelling*, **153**, 51–68.



- 367 Buchwald, E., Wind, P., Bruun, H.H., Møller, P.F., Ejrnæs, R. & Svart, H.E. (2013) Hvilke planter er  
368 hjemmehørende i Danmark? *Flora & Fauna*, **118**, 73–96.
- 369 Burdon, J.J., Thrall, P.H. & Ericson, a.L. (2006) The current and future dynamics of disease in plant  
370 communities. *Annual Review of Phytopathology*, **44**, 19–39.
- 371 Burnham, K.P. & Anderson, D.R. (2002) Model selection and multimodel inference: a practical information-  
372 theoretic approach, Springer, New York.
- 373 Cain, M.L., Milligan, B.G. & Strand, A.E. (2000) Long-distance seed dispersal in plant populations. *American*  
374 *Journal of Botany*, **87**, 1217–1227.
- 375 Cornelissen, J.H.C., Lavorel, S., Garnier, E., Diaz, S., Buchmann, N., Gurvich, D.E., Reich, P.B., ter Steege, H.,  
376 Morgan, H.D., van der Heijden, M G A, Pausas, J.G. & Poorter, H. (2003) A handbook of protocols for  
377 standardised and easy measurement of plant functional traits worldwide. *Australian Journal of Botany*, **51**,  
378 335–380.
- 379 Diekmann, M. (2003) Species indicator values as an important tool in applied plant ecology – a review. *Basic*  
380 *and Applied Ecology*, **4**, 493–506.
- 381 Diekmann, M. & Falkengren-Grerup, U. (1998) A new species index for forest vascular plants: development  
382 of functional indices based on mineralization rates of various forms of soil nitrogen. *Journal of Ecology*, **86**,  
383 269–283.
- 384 Diniz-Filho, J.A.F. & Bini, L.M. (2005) Modelling geographical patterns in species richness using eigenvector-  
385 based spatial filters. *Global Ecology and Biogeography*, **14**, 177–185.
- 386 Dupré, C. & Ehrlén, J. (2002) Habitat configuration, species traits and plant distributions. *Journal of Ecology*,  
387 **90**, 796–805.
- 388 Durka & Michalski. (2012) Daphne: a dated phylogeny of a large European flora for phylogenetically  
389 informed ecological analyses. *Ecology*, **93**, 2297–2297.
- 390 Ejrnæs, R. & Bruun, H.H. (2000) Gradient analysis of dry grassland vegetation in Denmark. *Journal of*  
391 *Vegetation Science*, **11**, 573–584.
- 392 Ellenberg, H., Weber, H.E., Düll, R., Wirth, V. & Werner, W. (2001) *Zeigerwerte von planzen in Mitteleuropa*,  
393 3rd edn. Erich Goltze GmbH & Co KG, Göttingen.
- 394 Eriksson, O. (1996) Regional dynamics of plants: a review of evidence for remnant, source-sink and  
395 metapopulations. *Oikos*, **77**, 248–258.
- 396 Ewald, J. (2002) A probabilistic approach to estimating species pools from large compositional matrices.  
397 *Journal of Vegetation Science*, **13**, 191–198.
- 398 Fahrig, L. (2003) Effects of habitat fragmentation on biodiversity. *Annual Review of Ecology, Evolution, and*  
399 *Systematics*, **34**, 487–515.
- 400 Frederiksen, S., Rasmussen, F.N. & Seberg, O. (2006) *Dansk Flora*, 1st edn. Gyldendal, Copenhagen.

- 401 Fredshavn, J.R., Nygaard, B. & Ejrnæs, R. (2009) Naturtilstand på terrestriske naturarealer - besigtigelser af  
402 §3-arealer.
- 403 Fritzbøgger, B. & Odgaard, B. (2010) Skovenes historie. Naturen i Danmark - Skovene (ed P.F. Møller),  
404 Gyldendal, Copenhagen.
- 405 Gijbels, P., Adriaens, D. & Honnay, O. (2012) An orchid colonization credit in restored calcareous grasslands.  
406 *Ecoscience*, **19**, 21–28.
- 407 Gittleman, J.L. & Kot, M. (1990) Adaptation: statistics and a null model for estimating phylogenetic effects.  
408 *Systematic Zoology*, **39**, 227–241.
- 409 Grime, J.P. (1979) *Plant strategies and vegetation processes*, 1st edn. John Wiley & Sons, Chichester, New  
410 York, Brisbane, Toronto.
- 411 Hansen, K. (1996) *Dansk Feltflora*, 1st edn. Gyldendal, Copenhagen.
- 412 Hartnett, D.C. & Wilson, G.W.T. (1999) Mycorrhizae Influence Plant Community Structure and Diversity in  
413 Tallgrass Prairie. *Ecology*, **80**, 1187–1195.
- 414 Hempel, Götzenberger, Kühn, Michalski, Rillig, Zobel & Moora. (2013) Mycorrhizas in the Central European  
415 flora: relationships with plant life history traits and ecology. *Ecology*, **94**, 1389–1399.
- 416 Hill, M.O., Mountford, J.O., Roy, D.B. & Bunce, R.G.H. (1999) *Ellenberg's indicator values for British plants*,  
417 Natural Environment Research Council, UK.
- 418 Hubbell, S.P. (2001) *The unified neutral theory of biodiversity and biogeography*, 1st edn. Princeton  
419 University Press, Princeton and Oxford.
- 420 Kleyer, M., Bekker, R.M., Knevel, I.C., Bakker, J.P., Thompson, K., Sonnenschein, M., Poschlod, P., Van  
421 Groenendael, J.M., Klimeš, L., Klimešová, J., Klotz, S., Rusch, G.M., Hermy, M., Adriaens, D., Boedeltje, G.,  
422 Bossuyt, B., Dannemann, A., Endels, P., Götzenberger, L., Hodgson, J.G., Jackel, A., Kühn, I., Kunzmann, D.,  
423 Ozinga, W.A., Römermann, C., Stadler, M., Schlegelmilch, J., Steendam, H.J., Tackenberg, O., Wilmann, B.,  
424 Cornelissen, J.H.C., Eriksson, O., Garnier, E. & Peco, B. (2008) The LEDA Traitbase: a database of life-history  
425 traits of the Northwest European flora. *Journal of Ecology*, **96**, 1266–1274.
- 426 Klironomos, J.N. (2003) Variation in plant response to native and exotic arbuscular mycorrhizal fungi.  
427 *Ecology*, **84**, 2292–2301.
- 428 Kochjarová, J. (2006) Contribution to the occurrence and former distribution of *Tephroses palustris*  
429 (Compositae) in the Central Europe. *Biologia*, **61**, 361–364.
- 430 Kühn, I., Durka, W. & Klotz, S. (2004) BioFlor — a new plant-trait database as a tool for plant invasion  
431 ecology. *Diversity and Distributions*, **10**, 363–365.
- 432 Lenoir, J., Gégout, J., Guisan, A., Vittoz, P., Wohlgemuth, T., Zimmermann, N.E., Dullinger, S., Pauli, H.,  
433 Willner, W., Grytnes, J., Virtanen, R. & Svenning, J. (2010) Cross-scale analysis of the region effect on  
434 vascular plant species diversity in Southern and Northern European mountain ranges. *PLoS ONE*, **5**, e15734.

- 435 Lewis, R.J., Szava-Kovats, R. & Pärtel, M. (2016) Estimating dark diversity and species pools: an empirical  
436 assessment of two methods. *Methods in Ecology and Evolution*, **7**, 104–113.
- 437 Marteinsdóttir, B. & Eriksson, O. (2013) Trait-based filtering from the regional species pool into local  
438 grassland communities. *Journal of Plant Ecology*, **7**, 347–355.
- 439 Maun, M.A. (1994) Adaptations enhancing survival and establishment of seedlings on coastal dune systems.  
440 *Plant Ecology*, **111**, 59–70.
- 441 May, F., Giladi, I., Ristow, M., Ziv, Y. & Jeltsch, F. (2013) Plant functional traits and community assembly  
442 along interacting gradients of productivity and fragmentation. *Perspectives in Plant Ecology, Evolution and*  
443 *Systematics*, **15**, 304–318.
- 444 McArthur, R.H. & Wilson, E.O. (1967) *The theory of island biogeography*, Princeton University Press,  
445 Princeton, NJ.
- 446 McCune, B. (1994) Improving community analysis with the Beals smoothing function. *Ecoscience*, **1**, 82–86.
- 447 McKane, R.B., Johnson, L.C., Shaver, G.R., Nadelhoffer, K.J., Rastetter, E.B., Fry, B., Giblin, A.E., Kielland, K.,  
448 Kwiatkowski, B.L., Laundre, J.A. & Murray, G. (2002) Resource-based niches provide a basis for plant species  
449 diversity and dominance in arctic tundra. *Nature*, **415**, 68–71.
- 450 Milberg, P., Bergstedt, J., Fridman, J., Odell, G. & Westerberg, L. (2008) Observer bias and random variation  
451 in vegetation monitoring data. *Journal of Vegetation Science*, **19**, 633–644.
- 452 Moeslund, J.E., Arge, L., Bøcher, P., Nygaard, B. & Svenning, J. (2011) Geographically comprehensive  
453 assessment of salt-meadow vegetation-elevation relations using LiDAR. *Wetlands*, **31**, 471–482.
- 454 Moeslund, J.E., Arge, L., Bøcher, P., Dalgaard, T., Odgaard, M.V., Nygaard, B. & Svenning, J. (2013)  
455 Topographically controlled soil moisture is the primary driver of local vegetation patterns across a lowland  
456 region. *Ecosphere*, **4**, art91.
- 457 Mokany, K. & Paini, D.R. (2011) Dark diversity: adding the grey. *Trends in Ecology & Evolution*, **26**, 264–265.
- 458 Moles, A.T. & Westoby, M. (2004) Seedling survival and seed size: a synthesis of the literature. *Journal of*  
459 *Ecology*, **92**, 372–383.
- 460 Mossberg, B. & Stenberg, L. (2005) *Den nye nordiske flora*, 1st edn. Gyldendal, Copenhagen, Denmark.
- 461 Muller-Landau, H.C., Wright, S.J., Calderón, O., Hubbell, S.P. & Foster, R.B. (2002) Assessing recruitment  
462 limitation: concepts, methods and case-studies from a tropical forest. *Seed dispersal and frugivory: ecology,*  
463 *evolution and conservation* (eds D.J. Levey, W.R. Silva & M. Galetti), pp. 35–53. CABI Publishing,  
464 Wallingford, UK.
- 465 Münzbergová, Z. & Herben, T. (2004) Identification of suitable unoccupied habitats in metapopulation  
466 studies using co-occurrence of species. *Oikos*, **105**, 408–414.
- 467 Myers, J.A. & Harms, K.E. (2009) Seed arrival, ecological filters, and plant species richness: a meta-analysis.  
468 *Ecology Letters*, **12**, 1250–1260.

- 469 Oksanen, J., Blanchet, F.G., Kindt, R., Legendre, P., Minchin, P.R., O'Hara, R.B., Simpson, G.L., Solymos, P.,  
470 Stevens, M.H.H. & Wagner, H. (2015) Vegan: Community ecology package. R package version 2.3-2.
- 471 Olsson, K. & Tyler, T. (2001) A historic perspective on the red-listed species of Scania, S. Sweden. *Botaniska*  
472 *Notiser*, **134**, 1–5.
- 473 Osmond, C.B., Austin, M.P., Berry, J.A., Billings, W.D., Boyer, J.S., Dacey, J.W.H., Nobel, P.S., Smith, S.D. &  
474 Winner, W.E. (1987) Stress physiology and the distribution of plants. *Bioscience*, **37**, 48.
- 475 Paradis, Claude & Strimmer. (2004) APE: Analyses of phylogenetics and evolution in R language.  
476 *Bioinformatics*, **20**, 289–290.
- 477 Paradis, E. (2015) Moran's autocorrelation coefficient in comparative methods. .
- 478 Pärtel, M., Szava-Kovats, R. & Zobel, M. (2011) Dark diversity: shedding light on absent species. *Trends in*  
479 *Ecology & Evolution*, **26**, 124–128.
- 480 Pärtel, M., Zobel, M., Zobel, K. & van der Maarel, E. (1996) The species pool and its relation to species  
481 richness: evidence from Estonian plant communities. *Oikos*, **75**, 111–117.
- 482 Pierce, S., Bottinelli, A., Bassani, I., Ceriani, R.M. & Cerabolini, B.E.L. (2014) How well do seed production  
483 traits correlate with leaf traits, whole-plant traits and plant ecological strategies? *Plant Ecology*, **215**, 1351–  
484 1359.
- 485 Quinn, G.P. & Keough, M.J. (2002) *Experimental design and data analysis for biologists*, 1st edn. Cambridge  
486 University Press, Cambridge.
- 487 R Core Team. (2015) *R: A language and environment for statistical computing*.
- 488 Reed, T.E., Waples, R.S., Schindler, D.E., Hard, J.J. & Kinnison, M.T. (2010) Phenotypic plasticity and  
489 population viability: the importance of environmental predictability. *Proceedings of the Royal Society of*  
490 *London B: Biological Sciences*, **277**, 3391–3400.
- 491 Rees, M. (1994) Delayed germination of seeds: a look at the effects of adult longevity, the timing of  
492 reproduction, and population age/stage structure. *The American Naturalist*, **144**, 43–64.
- 493 Riibak, K., Reitalu, T., Tamme, R., Helm, A., Gerhold, P., Znamenskiy, S., Bengtsson, K., Rosén, E., Prentice,  
494 H.C. & Pärtel, M. (2015) Dark diversity in dry calcareous grasslands is determined by dispersal ability and  
495 stress-tolerance. *Ecography*, **38**, 713–721.
- 496 Ronk, A., Szava-Kovats, R. & Pärtel, M. (2015) Applying the dark diversity concept to plants at the European  
497 scale. *Ecography*, **38**, 1015–1025.
- 498 Seddon, P.J. (2010) From reintroduction to assisted colonization: moving along the conservation  
499 translocation spectrum. *Restoration Ecology*, **18**, 796–802.
- 500 Seidling. (2005) Ground floor vegetation assessment within the intensive (Level II) monitoring of forest  
501 ecosystems in Germany: chances and challenges. *European Journal of Forest Research*, **124**, 301–312.

- 502 Šerá, B. & Šerý, M. (2004) Number and weight of seeds and reproductive strategies of herbaceous plants.  
503 *Folia Geobotanica*, **39**, 27–40.
- 504 Tamme, R., Götzenberger, L., Zobel, M., Bullock, J.M., Hooftman, D.A.P., Kaasik, A. & Pärtel, M. (2014)  
505 Predicting species' maximum dispersal distances from simple plant traits. *Ecology*, **95**, 505–513.
- 506 Tilman, D. (1997) Community invasibility, recruitment limitation, and grassland biodiversity. *Ecology*, **78**,  
507 81-92.
- 508 Tilman, D. (1994) Competition and biodiversity in spatially structured habitats. *Ecology*, **75**, 2–16.
- 509 Torrez, V., Ceulemans, T., Mergeay, J., de Meester, L. & Honnay, O. (2016) Effects of adding an arbuscular  
510 mycorrhizal fungi inoculum and of distance to donor sites on plant species recolonization following topsoil  
511 removal. *Applied Vegetation Science*, **19**, 7–19.
- 512 Yoshioka, A., Miyazaki, Y., Sekizaki, Y., Suda, S., Kadoya, T. & Washitani, I. (2014) A “lost biodiversity”  
513 approach to revealing major anthropogenic threats to regional freshwater ecosystems. *Ecological*  
514 *Indicators*, **36**, 348-355.
- 515
- 516

517 **Table 1.** An overview of the included explanatory variables with a brief description of each variable. For  
 518 abbreviations see Table 2

| Explanatory variable         | Short description                                                                                                                     | Variable nature            | Relevant literature                           |
|------------------------------|---------------------------------------------------------------------------------------------------------------------------------------|----------------------------|-----------------------------------------------|
| EIV <sub>L</sub>             | Plants' preference for light level                                                                                                    | Ordinal (1–9)              | (Ellenberg et al. 2001)                       |
| EIV <sub>F</sub>             | Plants' preference for soil moisture                                                                                                  | Ordinal (1–12)             | (Ellenberg et al. 2001)                       |
| EIV <sub>N/R</sub>           | Soil nutrients and pH is usually positively correlated. To take this into account this ratio is used to represent nutrient enrichment | Continuous (0.13 – 2.00)   | (Ellenberg et al. 2001, Andersen et al. 2013) |
| Grime C                      | Plants' competitive ability                                                                                                           | Ordinal (1–12)             | (Grime 1979)                                  |
| Grime S                      | Plants' stress tolerance (e.g., tolerance towards grazing, cutting, drought, soil salinity etc.)                                      | Ordinal (1–12)             | (Grime 1979)                                  |
| Grime R                      | Plants' ruderality (tendency to occur in ruderal areas)                                                                               | Ordinal (1–12)             | (Grime 1979)                                  |
| Mean mycorrhiza infection %  | The mean infection percentage of the plants' roots by mycorrhiza                                                                      | Continuous (1–100 %)       | (Akhmetzhanova et al. 2012)                   |
| Mycorrhizal dependence       | Whether (1) or not (0) the plants are obligately mycorrhizal. Binary variable                                                         | Nominal (0 vs. 1)          | (Hempel et al. 2013)                          |
| Log(Seed mass)               | The logarithm to the mean seed mass                                                                                                   | Continuous (-2.52 – 2.13)  | (Kühn et al. 2004, Riibak et al. 2014)        |
| Log(Max. dispersal distance) | The logarithm to the maximum dispersal distance based on plant traits and taxonomy                                                    | Continuous (-1.13 – 10.72) | (Tamme et al. 2014, Riibak et al. 2014)       |

519

520

521 **Table 2.** Standardised coefficients (their rank based on the numeric size of the standard coefficient is given  
 522 in parentheses) of each of the 12 candidate models relating the probability for plant species of being part of  
 523 the dark diversity to the explanatory factors used in this study. Results are presented both for the high-  
 524 sample size models, medium sample size models and the low sample-size models (See details in Table S2).  
 525 Grey cells mark explanatory variables that were not included in the model. For each model the deviance  
 526 explained –  $D^2_{\text{adjusted}}$  ( $D^2_{\text{adj}}$ ) – is shown together with the  $D^2_{\text{adj}}$  for models after adding the necessary number  
 527 of filters (also shown) to remove phylogenetic autocorrelation (see methods). For each explanatory variable  
 528 the absolute (abs.) mean standardised coefficient (coef.) is given to represent its overall relative  
 529 importance. Abbreviations: C: competition, S: stress, R: ruderality, Disp.: dispersal, Dist.: distance, SM: seed  
 530 mass, EIV: Ellenberg Indicator for light (L), moisture (F), nutrients (N) and reaction (R), M.: mycorrhiza  
 531

| Explanatory variable            | Model specification               |         |         |                                     |             |             |                                  |                 |                 |                  |                  |                  | Mean abs. coef. |
|---------------------------------|-----------------------------------|---------|---------|-------------------------------------|-------------|-------------|----------------------------------|-----------------|-----------------|------------------|------------------|------------------|-----------------|
|                                 | High sample size models (n = 564) |         |         | Medium sample size models (n = 457) |             |             | Low sample size models (n = 151) |                 |                 |                  |                  |                  |                 |
|                                 | Grime C                           | Grime S | Grime R | Grime C + D                         | Grime S + D | Grime R + D | Grime C + D + M                  | Grime S + D + M | Grime R + D + M | Grime C + SM + M | Grime S + SM + M | Grime R + SM + M |                 |
| EIV <sub>L</sub>                | -.23***                           | .24***  | .29***  | -.23***                             | -.24***     | -.28***     | -.45***                          | -.51***         | -.53***         | -.45***          | -.54***          | -.54***          | .38             |
| EIV <sub>F</sub>                | .05***                            | .01***  | .05***  | .06***                              | .01*        | .07***      | -.01                             | .01***          | .05***          | -.00             | -.00             | .06***           | .03             |
| EIV <sub>N/R</sub>              | -.03***                           | .11***  | .20***  | -.19***                             | -.26***     | -.35***     | -.33***                          | -.46***         | -.39***         | -.34***          | -.49***          | -.41***          | .30             |
| Grime C                         | -.22***                           |         |         | -.20***                             |             |             | -.02***                          |                 |                 | -.02***          |                  |                  | .12             |
| Grime S                         |                                   | .02***  |         |                                     | .01***      |             |                                  | -.19***         |                 |                  | -.21***          |                  | .11             |
| Grime R                         |                                   |         | .22***  |                                     |             | .21***      |                                  |                 | .17***          |                  |                  | .18***           | .20             |
| Log(MDD)                        |                                   |         |         | -.21***                             | -.25***     | -.23***     | .02***                           | -.05***         | -.00            |                  |                  |                  | .13             |
| Log(SM)                         |                                   |         |         |                                     |             |             |                                  |                 |                 | .11***           | .12***           | .14***           | .12             |
| Mean M inf. %                   |                                   |         |         |                                     |             |             | .15***                           | .16***          | .14***          | .12***           | .12***           | .10***           | .13             |
| M dependence                    |                                   |         |         |                                     |             |             | .34***                           | .41***          | .42***          | .35***           | .40***           | .42***           | .39             |
| $D^2_{\text{adj}}$              | .04                               | .01     | .04     | .08                                 | .06         | .09         | .11                              | .12             | .13             | .11              | .13              | .14              |                 |
| $D^2_{\text{adj}}$ (w/ filters) |                                   |         |         | .10                                 | .08         | .10         | .11                              |                 |                 | .12              | .14              |                  |                 |

532 

| No. of filters |              | 8 | 8 | 7 | 1 |  | 1 | 1 |  |
|----------------|--------------|---|---|---|---|--|---|---|--|
|                | P: < 0.05: * |   |   |   |   |  |   |   |  |
|                | <0.01: **    |   |   |   |   |  |   |   |  |
|                | <0.001***    |   |   |   |   |  |   |   |  |

533



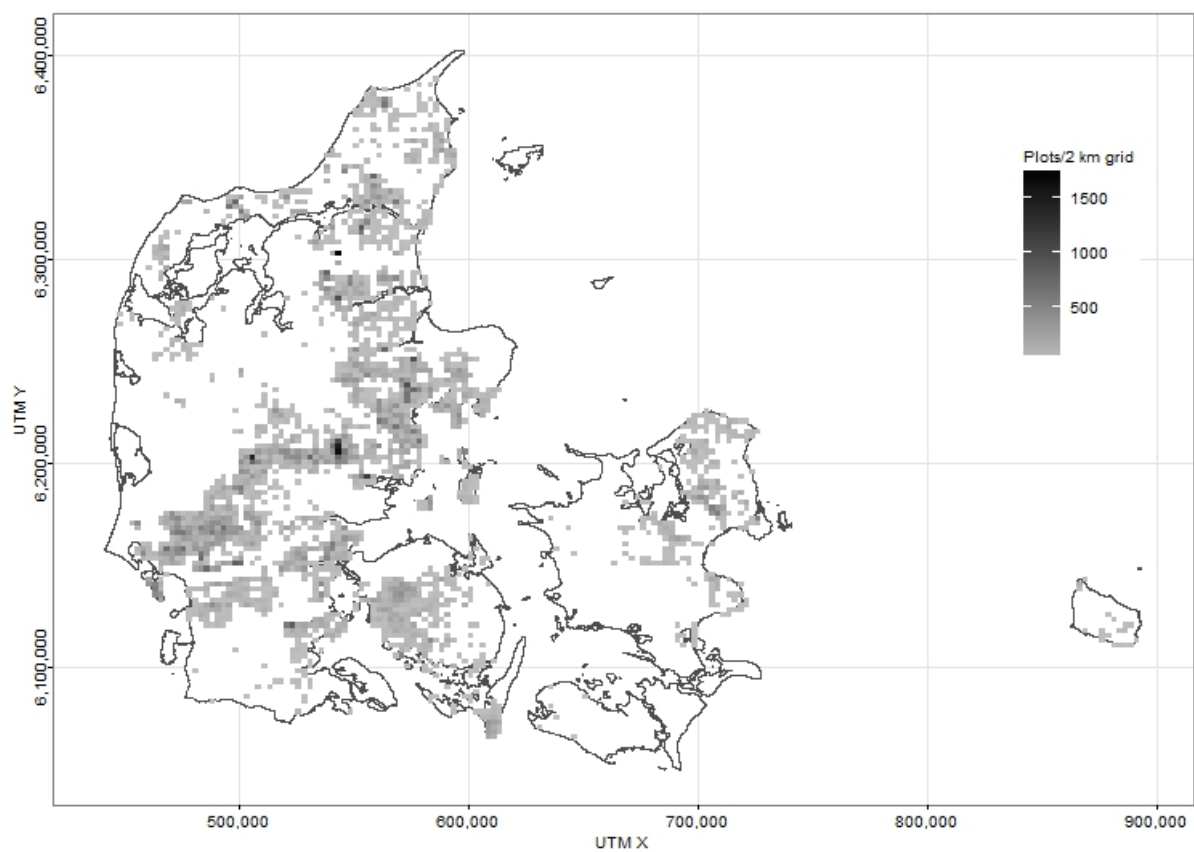

534

535 **Figure 1.** The density of the 15,160 vegetation plots used for this study

536

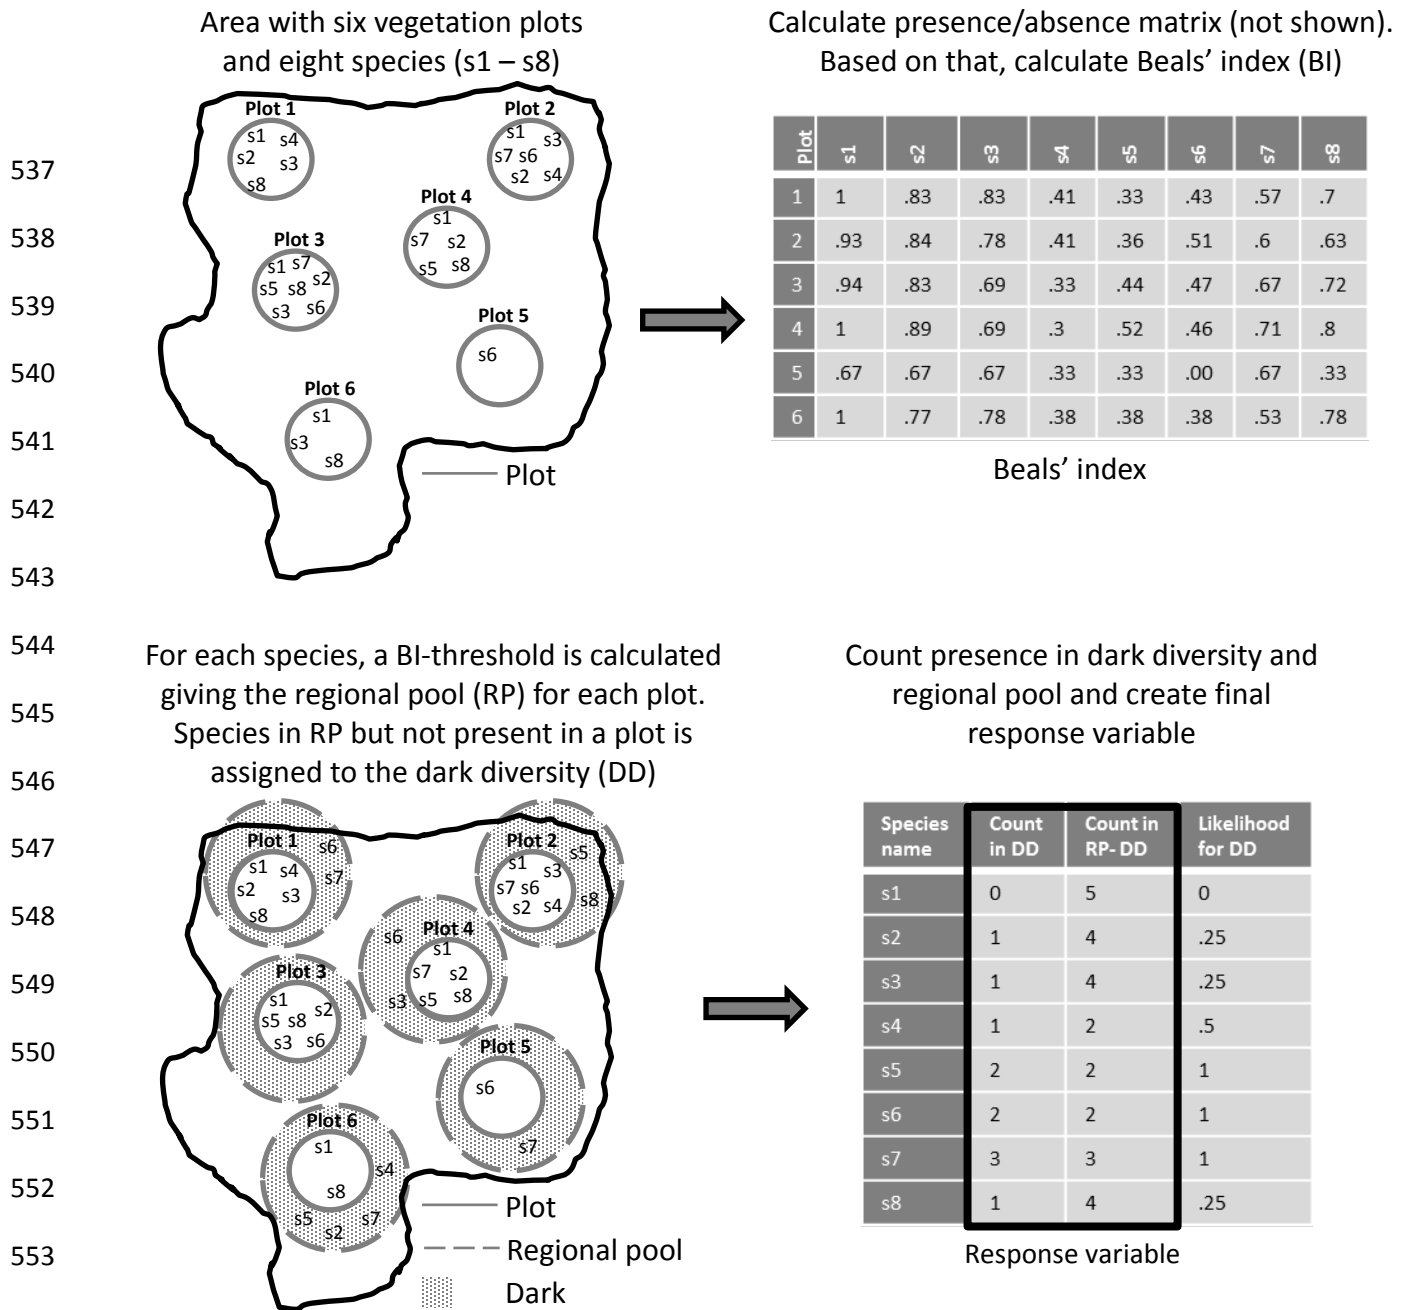

**Figure 2.** The steps taken from vegetation plot data to response variable. A fictive area with eight fictive species is used for illustration purpose

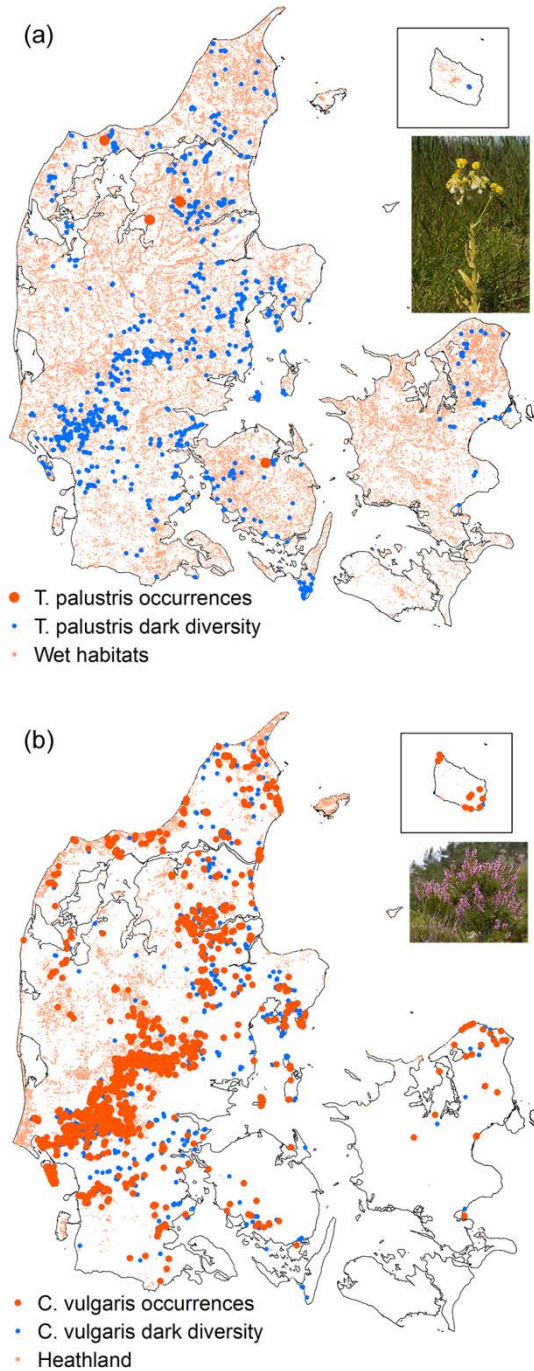

558

559 **Figure 3.** The distribution of occurrences and dark diversity locations for (a) a species often found in dark  
560 diversity (*Tephroseris palustris*) and (b) a species relatively rarely found in the dark diversity in this study  
561 (*Calluna vulgaris*). For reference, known wet habitats and heathlands are shown. Map inserts: island of  
562 Bornholm (Fig. 1)

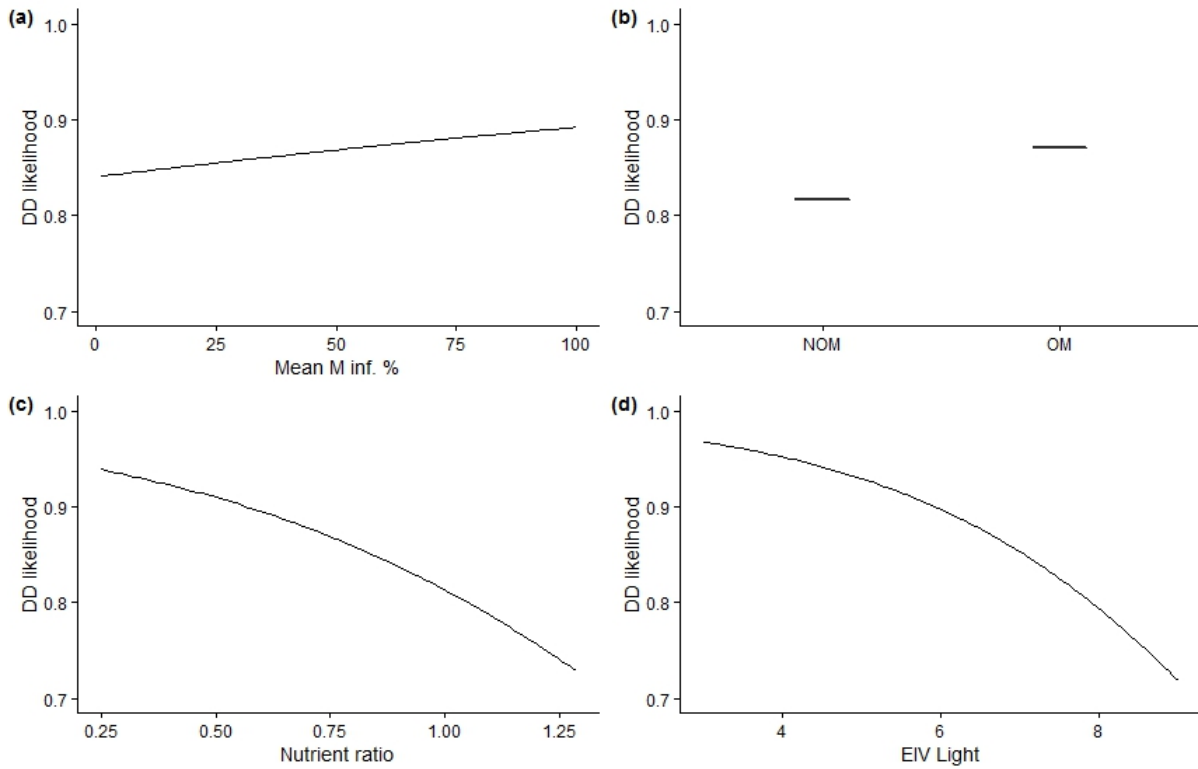

563

564 **Figure 4.** Predictions of the relationship between the dark diversity likelihood of a plant and (a) mean  
565 mycorrhizal infection percentage, (b) mycorrhizal dependence, (c) nutrient/reaction-ratio (nutrient ratio)  
566 based on Ellenberg Indicator Values (EIV) and (d) EIV for light. The predictions shown are based on the  
567 *Grime R + SM + M* model having the highest goodness of fit (Table 2). Predictive variables not in question  
568 were held constant during the predictions shown. DD: dark diversity, NOM: not obligately mycorrhizal, OM:  
569 obligately mycorrhizal, M: mycorrhizal, inf.: infection
